# Supplementary material for: Impact of urbanisation on the diversity and abundance of butterflies along an urban gradient in Guwahati, Assam, India
Source: Research Square preprint supplement (doi:10.21203/rs.3.rs-8777530/v1), 2026-02-19
Supplement: Supplementary file 1 [file 5a4ad5d3607cff9442c2cb48.docx]

**Urban Ecosystems**

**Impact of urbanisation on the diversity and abundance of butterflies along an urban gradient in Guwahati, Assam, India**

Nayanjyoti Moran1, Renu Gogoi2, Narayan Sharma1

**1**Department of Environmental Biology and Wildlife Sciences, Cotton University, Panbazar, Guwahati 781001, Assam, India

2Department of Zoology, Cotton University, Panbazar, Guwahati 781001, Assam, India

Email: [narayan.sharma@cottonuniversity.ac.in](mailto:narayan.sharma@cottonuniversity.ac.in) (*corresponding author)

**Table S1** Distribution and abundance of 174 butterfly species in forest, semi-urban, and urban sites

| Sl No. | Species Name | Abundance | | | | | | | | | | | |
| --- | --- | --- | --- | --- | --- | --- | --- | --- | --- | --- | --- | --- | --- |
| Forest | | | | Semi-urban | | | | Urban | | | |
| F1 | F2 | F3 | F4 | SU1 | SU2 | SU3 | SU4 | U1 | U2 | U3 | U4 |
|  | Angled Castor | 2 | 2 | 0 | 1 | 0 | 0 | 0 | 1 | 0 | 0 | 0 | 0 |
|  | Angled Pierrot | 0 | 0 | 0 | 1 | 0 | 0 | 0 | 0 | 0 | 0 | 0 | 0 |
|  | Angled Red Forester | 1 | 2 | 0 | 0 | 1 | 4 | 2 | 0 | 5 | 0 | 0 | 0 |
|  | Apefly | 0 | 3 | 0 | 0 | 0 | 0 | 0 | 0 | 0 | 0 | 0 | 0 |
|  | Autumn Leaf | 3 | 1 | 0 | 0 | 0 | 0 | 0 | 0 | 0 | 0 | 0 | 0 |
|  | Banded Lineblue | 0 | 1 | 2 | 0 | 0 | 0 | 0 | 0 | 0 | 0 | 0 | 0 |
|  | Banded Treebrown | 2 | 2 | 0 | 0 | 11 | 0 | 11 | 0 | 0 | 0 | 1 | 1 |
|  | Black Paint-brush Swift | 1 | 1 | 0 | 0 | 0 | 0 | 0 | 0 | 0 | 0 | 0 | 0 |
|  | Black-veined Branded Redeye | 0 | 1 | 0 | 0 | 0 | 0 | 1 | 0 | 0 | 0 | 0 | 0 |
|  | Blackvein Sergeant | 1 | 0 | 0 | 0 | 0 | 0 | 0 | 0 | 0 | 0 | 0 | 0 |
|  | Blue Admiral | 0 | 1 | 0 | 0 | 0 | 2 | 0 | 0 | 0 | 0 | 1 | 0 |
|  | Blue Imperial | 1 | 1 | 2 | 0 | 0 | 0 | 0 | 0 | 0 | 0 | 0 | 0 |
|  | Blue Tiger | 0 | 0 | 0 | 0 | 0 | 0 | 2 | 0 | 1 | 1 | 0 | 0 |
|  | Bright Sunbeam | 0 | 0 | 0 | 5 | 0 | 0 | 0 | 0 | 0 | 0 | 0 | 0 |
|  | Bush Hopper | 0 | 0 | 0 | 0 | 0 | 0 | 3 | 0 | 0 | 0 | 0 | 0 |
|  | Centaur Oakblue | 7 | 1 | 1 | 0 | 2 | 0 | 0 | 0 | 2 | 0 | 0 | 0 |
|  | Chestnut Angle | 0 | 1 | 0 | 1 | 0 | 0 | 1 | 0 | 0 | 0 | 0 | 0 |
|  | Chestnut Bob | 9 | 5 | 0 | 2 | 1 | 0 | 4 | 0 | 0 | 0 | 6 | 8 |
|  | Chinese Bushbrown | 0 | 0 | 0 | 0 | 0 | 0 | 2 | 0 | 0 | 0 | 0 | 0 |
|  | Chocolate Albatross | 0 | 0 | 1 | 0 | 0 | 0 | 2 | 0 | 0 | 0 | 0 | 1 |
|  | Chocolate Demon | 2 | 2 | 0 | 0 | 0 | 2 | 0 | 0 | 0 | 0 | 0 | 1 |
|  | Chocolate Pansy | 12 | 1 | 3 | 0 | 0 | 1 | 5 | 0 | 0 | 2 | 0 | 0 |
|  | Chocolate Royal | 0 | 2 | 0 | 0 | 0 | 0 | 0 | 0 | 0 | 0 | 0 | 0 |
|  | Clipper | 0 | 0 | 1 | 0 | 0 | 0 | 5 | 0 | 0 | 0 | 0 | 0 |
|  | Colour Sergeant | 0 | 0 | 0 | 0 | 0 | 1 | 0 | 0 | 0 | 0 | 0 | 0 |
|  | Commander | 2 | 2 | 0 | 0 | 0 | 0 | 1 | 0 | 3 | 0 | 1 | 0 |
|  | Common Acacia Blue | 0 | 2 | 2 | 0 | 0 | 3 | 1 | 0 | 0 | 0 | 4 | 1 |
|  | Common Albatross | 0 | 1 | 0 | 0 | 0 | 1 | 0 | 0 | 0 | 0 | 0 | 0 |
|  | Common Archduke | 2 | 0 | 0 | 0 | 0 | 0 | 0 | 0 | 0 | 0 | 0 | 0 |
|  | Common Awl | 1 | 0 | 0 | 1 | 0 | 0 | 2 | 0 | 0 | 0 | 0 | 0 |
|  | Common Banded Demon | 0 | 2 | 0 | 0 | 0 | 0 | 0 | 0 | 0 | 1 | 0 | 1 |
|  | Common Baron | 0 | 2 | 0 | 0 | 0 | 0 | 0 | 0 | 0 | 0 | 0 | 1 |
|  | Common Batwing | 8 | 4 | 4 | 0 | 0 | 0 | 2 | 0 | 0 | 0 | 0 | 0 |
|  | Common Birdwing | 6 | 3 | 4 | 5 | 0 | 0 | 1 | 0 | 0 | 0 | 0 | 0 |
|  | Common Bluebottle | 3 | 4 | 0 | 5 | 0 | 0 | 0 | 0 | 0 | 0 | 0 | 1 |
|  | Common Castor | 9 | 5 | 6 | 4 | 3 | 6 | 9 | 28 | 0 | 19 | 11 | 3 |
|  | Common Cerulean | 9 | 10 | 1 | 4 | 0 | 11 | 2 | 2 | 6 | 0 | 4 | 8 |
|  | Common Crow | 2 | 6 | 8 | 9 | 0 | 1 | 0 | 1 | 2 | 0 | 0 | 0 |
|  | Common Duffer | 1 | 2 | 0 | 0 | 0 | 0 | 0 | 0 | 0 | 0 | 0 | 0 |
|  | Common Earl | 4 | 0 | 0 | 0 | 0 | 0 | 0 | 0 | 0 | 0 | 0 | 0 |
|  | Common Emigrant | 6 | 19 | 8 | 1 | 0 | 0 | 7 | 0 | 4 | 9 | 8 | 9 |
|  | Common Evening Brown | 10 | 3 | 1 | 1 | 39 | 10 | 9 | 9 | 19 | 0 | 13 | 8 |
|  | Common Five-ring | 7 | 5 | 4 | 6 | 0 | 0 | 5 | 3 | 0 | 0 | 8 | 5 |
|  | Common Four-ring | 8 | 3 | 5 | 2 | 0 | 8 | 12 | 2 | 0 | 7 | 0 | 3 |
|  | Common Grass Yellow | 0 | 8 | 1 | 7 | 2 | 0 | 5 | 20 | 0 | 0 | 0 | 1 |
|  | Common Gull | 0 | 3 | 1 | 1 | 0 | 0 | 6 | 0 | 0 | 11 | 2 | 1 |
|  | Common Hedge Blue | 0 | 1 | 0 | 0 | 0 | 0 | 2 | 0 | 0 | 0 | 0 | 0 |
|  | Common Imperial | 0 | 0 | 0 | 1 | 0 | 0 | 0 | 0 | 0 | 0 | 0 | 1 |
|  | Common Jay | 1 | 1 | 0 | 1 | 0 | 0 | 0 | 0 | 0 | 0 | 0 | 0 |
|  | Common Jester | 4 | 2 | 0 | 1 | 0 | 4 | 2 | 0 | 0 | 6 | 3 | 1 |
|  | Common Lascar | 12 | 8 | 3 | 2 | 1 | 3 | 28 | 3 | 5 | 0 | 13 | 0 |
|  | Common Map | 0 | 1 | 0 | 0 | 0 | 0 | 0 | 0 | 0 | 0 | 0 | 0 |
|  | Common Maplet | 0 | 1 | 0 | 0 | 0 | 0 | 0 | 0 | 0 | 0 | 0 | 0 |
|  | Common Mime | 0 | 3 | 0 | 0 | 0 | 0 | 0 | 0 | 0 | 0 | 0 | 0 |
|  | Common Mormon | 16 | 24 | 5 | 10 | 16 | 18 | 14 | 15 | 13 | 0 | 23 | 11 |
|  | Common Nawab | 5 | 3 | 0 | 10 | 1 | 0 | 5 | 0 | 0 | 0 | 0 | 0 |
|  | Common Palmfly | 0 | 4 | 0 | 0 | 2 | 2 | 17 | 9 | 0 | 24 | 3 | 2 |
|  | Common Pierrot | 4 | 1 | 1 | 0 | 0 | 5 | 3 | 4 | 8 | 0 | 5 | 0 |
|  | Common Quaker | 0 | 1 | 1 | 0 | 0 | 0 | 2 | 24 | 0 | 0 | 0 | 1 |
|  | Common Raven | 0 | 1 | 0 | 0 | 0 | 0 | 0 | 0 | 0 | 0 | 0 | 0 |
|  | Common Red Flash | 0 | 1 | 0 | 0 | 0 | 0 | 0 | 0 | 0 | 0 | 0 | 0 |
|  | Common Red Forester | 1 | 1 | 0 | 0 | 0 | 0 | 0 | 0 | 0 | 0 | 0 | 0 |
|  | Common Redeye | 0 | 1 | 0 | 0 | 0 | 1 | 0 | 0 | 1 | 0 | 0 | 0 |
|  | Common Rose | 7 | 3 | 2 | 0 | 0 | 0 | 0 | 0 | 0 | 0 | 0 | 0 |
|  | Common Sailer | 34 | 26 | 3 | 3 | 12 | 8 | 69 | 4 | 15 | 0 | 21 | 0 |
|  | Common Sergeant | 0 | 1 | 0 | 0 | 0 | 0 | 0 | 0 | 0 | 0 | 0 | 0 |
|  | Common Small Flat | 5 | 2 | 2 | 0 | 0 | 0 | 5 | 0 | 0 | 0 | 0 | 0 |
|  | Common Snow Flat | 9 | 2 | 3 | 2 | 2 | 0 | 2 | 4 | 0 | 0 | 6 | 0 |
|  | Common Tit | 0 | 1 | 0 | 0 | 0 | 0 | 0 | 0 | 0 | 0 | 0 | 1 |
|  | Common Wanderer | 0 | 2 | 0 | 1 | 0 | 0 | 0 | 0 | 0 | 0 | 0 | 0 |
|  | Common Windmill | 1 | 4 | 2 | 0 | 0 | 2 | 0 | 0 | 0 | 0 | 0 | 0 |
|  | Common Yeoman | 8 | 12 | 0 | 3 | 0 | 0 | 0 | 0 | 0 | 0 | 0 | 0 |
|  | Coon | 2 | 0 | 0 | 0 | 0 | 0 | 2 | 0 | 0 | 0 | 0 | 0 |
|  | Copper Flash | 1 | 1 | 0 | 0 | 0 | 0 | 0 | 0 | 0 | 0 | 0 | 0 |
|  | Cruiser | 14 | 3 | 3 | 1 | 0 | 4 | 1 | 0 | 0 | 0 | 0 | 0 |
|  | Dark Catseye | 1 | 0 | 0 | 0 | 0 | 0 | 0 | 0 | 0 | 0 | 0 | 0 |
|  | Dark Cerulean | 0 | 6 | 0 | 0 | 0 | 0 | 0 | 0 | 0 | 0 | 0 | 2 |
|  | Dark Evening Brown | 1 | 0 | 1 | 0 | 0 | 0 | 0 | 0 | 0 | 0 | 0 | 0 |
|  | Dark Grass Blue | 2 | 3 | 2 | 0 | 0 | 0 | 0 | 0 | 0 | 0 | 0 | 1 |
|  | Dark Sapphire | 1 | 0 | 0 | 0 | 0 | 0 | 0 | 0 | 0 | 0 | 0 | 0 |
|  | Dark-brand Bushbrown | 0 | 0 | 0 | 0 | 28 | 0 | 0 | 0 | 0 | 0 | 0 | 1 |
|  | Elbowed Pierrot | 0 | 4 | 0 | 0 | 0 | 0 | 0 | 0 | 0 | 0 | 0 | 0 |
|  | Falcate Oakblue | 0 | 0 | 0 | 0 | 0 | 0 | 0 | 0 | 2 | 0 | 0 | 0 |
|  | Five-bar Swordtail | 0 | 0 | 0 | 1 | 0 | 0 | 0 | 0 | 0 | 0 | 0 | 0 |
|  | Fluffy Tit | 0 | 5 | 3 | 0 | 0 | 0 | 2 | 0 | 0 | 0 | 0 | 1 |
|  | Forest Hopper | 4 | 4 | 0 | 0 | 0 | 0 | 0 | 0 | 0 | 0 | 0 | 0 |
|  | Forget-me-not | 3 | 0 | 0 | 0 | 0 | 0 | 0 | 0 | 0 | 0 | 0 | 0 |
|  | Fulvous Pied Flat | 0 | 2 | 0 | 0 | 0 | 0 | 0 | 0 | 0 | 0 | 0 | 0 |
|  | Glassy Bluebottle | 1 | 2 | 0 | 0 | 0 | 0 | 0 | 0 | 0 | 0 | 0 | 2 |
|  | Glassy Tiger | 0 | 1 | 1 | 0 | 0 | 0 | 0 | 1 | 0 | 0 | 0 | 0 |
|  | Golden Birdwing | 0 | 1 | 0 | 0 | 0 | 0 | 0 | 0 | 0 | 0 | 0 | 0 |
|  | Grass Demon | 0 | 1 | 0 | 0 | 0 | 0 | 0 | 0 | 0 | 0 | 0 | 0 |
|  | Great Blue Mime | 2 | 0 | 0 | 0 | 0 | 0 | 0 | 0 | 0 | 0 | 0 | 0 |
|  | Great Duffer | 0 | 0 | 0 | 0 | 0 | 0 | 0 | 0 | 0 | 0 | 0 | 1 |
|  | Great Eggfly | 5 | 3 | 4 | 0 | 0 | 0 | 5 | 0 | 0 | 0 | 0 | 2 |
|  | Great Mormon | 7 | 2 | 4 | 2 | 0 | 2 | 0 | 0 | 0 | 0 | 0 | 0 |
|  | Great Nawab | 1 | 0 | 0 | 0 | 0 | 0 | 0 | 0 | 0 | 0 | 0 | 0 |
|  | Great Windmill | 6 | 4 | 1 | 6 | 0 | 0 | 0 | 0 | 0 | 0 | 0 | 0 |
|  | Grey Count | 23 | 2 | 4 | 1 | 5 | 13 | 7 | 21 | 34 | 0 | 0 | 0 |
|  | Grey Pansy | 4 | 2 | 0 | 0 | 1 | 2 | 3 | 3 | 7 | 1 | 5 | 1 |
|  | Grey Scrub Hopper | 0 | 0 | 0 | 0 | 0 | 0 | 1 | 0 | 0 | 0 | 0 | 0 |
|  | Himalayan Straight Swift | 0 | 0 | 0 | 0 | 0 | 0 | 0 | 0 | 0 | 1 | 0 | 0 |
|  | Indian Cabbage White | 5 | 4 | 0 | 3 | 0 | 0 | 5 | 4 | 0 | 4 | 6 | 3 |
|  | Indian Common Lineblue | 1 | 2 | 0 | 22 | 0 | 0 | 0 | 0 | 0 | 0 | 0 | 0 |
|  | Indian Grizzled Skipper | 1 | 0 | 0 | 0 | 0 | 0 | 0 | 0 | 0 | 0 | 0 | 0 |
|  | Indian Long-brand Bushbrown | 0 | 0 | 0 | 5 | 0 | 0 | 0 | 0 | 8 | 3 | 5 | 0 |
|  | Indian Palm Bob | 0 | 2 | 0 | 0 | 0 | 0 | 0 | 0 | 0 | 0 | 0 | 0 |
|  | Intermediate Bushbrown | 6 | 2 | 0 | 0 | 0 | 0 | 0 | 6 | 0 | 0 | 0 | 0 |
|  | Knight | 9 | 5 | 0 | 0 | 4 | 2 | 17 | 5 | 6 | 0 | 1 | 0 |
|  | Large Cabbage White | 0 | 5 | 0 | 0 | 0 | 0 | 1 | 0 | 0 | 0 | 0 | 0 |
|  | Large Yeoman | 0 | 2 | 0 | 2 | 0 | 0 | 0 | 0 | 0 | 0 | 0 | 0 |
|  | Lemon Pansy | 14 | 16 | 27 | 2 | 3 | 5 | 9 | 13 | 23 | 12 | 20 | 3 |
|  | Leopard Lacewing | 3 | 6 | 1 | 0 | 0 | 23 | 14 | 1 | 0 | 0 | 17 | 0 |
|  | Lesser Gull | 0 | 1 | 0 | 0 | 0 | 0 | 0 | 0 | 0 | 0 | 0 | 1 |
|  | Lesser Rice Swift | 0 | 0 | 0 | 0 | 0 | 0 | 0 | 1 | 0 | 0 | 0 | 0 |
|  | Lime Blue | 0 | 1 | 0 | 0 | 0 | 0 | 0 | 0 | 0 | 13 | 0 | 1 |
|  | Lime Swallowtail | 3 | 0 | 0 | 19 | 0 | 1 | 0 | 0 | 0 | 0 | 2 | 6 |
|  | Long-banded Silverline | 1 | 1 | 0 | 0 | 0 | 0 | 6 | 0 | 0 | 0 | 0 | 0 |
|  | Magpie Crow | 2 | 0 | 0 | 0 | 0 | 0 | 0 | 0 | 0 | 0 | 0 | 0 |
|  | Margined Lineblue | 0 | 0 | 0 | 5 | 0 | 0 | 0 | 0 | 0 | 0 | 0 | 0 |
|  | Medus Brown | 5 | 5 | 3 | 0 | 0 | 0 | 0 | 0 | 0 | 0 | 0 | 2 |
|  | Mottled Emigrant | 7 | 16 | 9 | 44 | 1 | 11 | 42 | 10 | 40 | 15 | 19 | 18 |
|  | Obscure Branded Swift | 0 | 0 | 0 | 0 | 0 | 0 | 0 | 0 | 2 | 0 | 0 | 0 |
|  | One-spot Grass Yellow | 8 | 5 | 4 | 3 | 0 | 0 | 0 | 0 | 0 | 0 | 3 | 1 |
|  | Orange Awlet | 1 | 0 | 0 | 0 | 0 | 0 | 0 | 0 | 1 | 0 | 0 | 0 |
|  | Orange Oakleaf | 0 | 2 | 0 | 0 | 0 | 0 | 1 | 0 | 0 | 0 | 0 | 0 |
|  | Painted Jezebel | 0 | 0 | 0 | 3 | 0 | 0 | 0 | 4 | 0 | 0 | 0 | 0 |
|  | Pale Grass Blue | 0 | 0 | 0 | 0 | 1 | 3 | 0 | 0 | 0 | 0 | 0 | 7 |
|  | Pea Blue | 1 | 1 | 0 | 0 | 0 | 0 | 0 | 0 | 0 | 0 | 2 | 0 |
|  | Peacock Pansy | 0 | 0 | 0 | 0 | 3 | 0 | 0 | 0 | 5 | 0 | 2 | 0 |
|  | Plain Banded Awl | 0 | 0 | 0 | 1 | 0 | 0 | 0 | 0 | 0 | 0 | 0 | 0 |
|  | Plain Earl | 1 | 0 | 0 | 0 | 0 | 0 | 0 | 0 | 0 | 0 | 0 | 0 |
|  | Plain Palm Dart | 0 | 2 | 0 | 0 | 0 | 0 | 0 | 0 | 0 | 0 | 0 | 0 |
|  | Plain Puffin | 0 | 1 | 0 | 0 | 0 | 0 | 0 | 0 | 0 | 0 | 0 | 1 |
|  | Plain Tiger | 7 | 4 | 0 | 0 | 1 | 2 | 0 | 1 | 0 | 10 | 0 | 1 |
|  | Plains Cupid | 0 | 3 | 0 | 0 | 0 | 0 | 0 | 0 | 4 | 0 | 0 | 0 |
|  | Plum Judy | 0 | 0 | 0 | 0 | 0 | 0 | 0 | 0 | 0 | 0 | 3 | 0 |
|  | Popinjay | 2 | 0 | 0 | 0 | 0 | 1 | 0 | 0 | 0 | 0 | 0 | 0 |
|  | Powdered Oakblue | 0 | 2 | 0 | 0 | 0 | 0 | 0 | 0 | 0 | 0 | 0 | 0 |
|  | Psyche | 3 | 3 | 1 | 6 | 34 | 8 | 10 | 38 | 32 | 44 | 2 | 12 |
|  | Punchinello | 2 | 1 | 0 | 1 | 0 | 0 | 4 | 0 | 1 | 0 | 0 | 1 |
|  | Purple and Gold Flitter | 1 | 0 | 0 | 0 | 0 | 0 | 0 | 0 | 0 | 0 | 0 | 0 |
|  | Purple Emperor | 0 | 0 | 0 | 1 | 0 | 0 | 0 | 0 | 0 | 0 | 0 | 0 |
|  | Purple Sapphire | 0 | 6 | 0 | 1 | 0 | 0 | 0 | 0 | 0 | 0 | 2 | 0 |
|  | Pygmy Scrub Hopper | 0 | 0 | 0 | 0 | 0 | 0 | 1 | 0 | 0 | 0 | 0 | 0 |
|  | Red Helen | 4 | 3 | 3 | 0 | 0 | 0 | 2 | 0 | 0 | 0 | 0 | 2 |
|  | Red Pierrot | 0 | 0 | 0 | 0 | 0 | 0 | 0 | 0 | 5 | 1 | 0 | 0 |
|  | Red-base Jezebel | 0 | 1 | 0 | 0 | 0 | 0 | 0 | 0 | 0 | 0 | 0 | 1 |
|  | Red-spot Jezebel | 2 | 5 | 2 | 0 | 0 | 0 | 0 | 0 | 13 | 0 | 0 | 0 |
|  | Small Branded Swift | 0 | 1 | 0 | 0 | 0 | 0 | 0 | 0 | 0 | 0 | 0 | 0 |
|  | Small Paint-brush Swift | 0 | 1 | 0 | 0 | 0 | 1 | 0 | 0 | 0 | 0 | 0 | 0 |
|  | Smaller Dartlet | 0 | 0 | 0 | 0 | 0 | 0 | 1 | 0 | 0 | 0 | 1 | 0 |
|  | Spangle | 2 | 1 | 0 | 0 | 0 | 0 | 0 | 0 | 0 | 0 | 0 | 0 |
|  | Spot Puffin | 0 | 0 | 0 | 0 | 0 | 0 | 0 | 0 | 0 | 0 | 0 | 1 |
|  | Striped Albatross | 0 | 2 | 3 | 3 | 0 | 4 | 15 | 4 | 0 | 2 | 4 | 0 |
|  | Striped Blue Crow | 4 | 1 | 1 | 1 | 0 | 0 | 0 | 0 | 0 | 0 | 0 | 0 |
|  | Striped Tiger | 0 | 2 | 0 | 0 | 2 | 0 | 4 | 0 | 0 | 1 | 0 | 0 |
|  | Studded Sergeant | 0 | 0 | 0 | 1 | 0 | 0 | 0 | 0 | 0 | 0 | 0 | 0 |
|  | Swinhoe's Forest Bob | 0 | 1 | 0 | 0 | 0 | 0 | 0 | 0 | 0 | 0 | 0 | 0 |
|  | Tailed Jay | 2 | 2 | 0 | 0 | 0 | 0 | 4 | 0 | 0 | 0 | 0 | 0 |
|  | Tawny Coster | 3 | 7 | 2 | 0 | 0 | 0 | 2 | 0 | 0 | 0 | 11 | 0 |
|  | Tawny Rajah | 2 | 1 | 0 | 1 | 0 | 0 | 0 | 0 | 0 | 0 | 0 | 0 |
|  | Three-spot Grass Yellow | 7 | 14 | 11 | 6 | 37 | 7 | 32 | 12 | 56 | 39 | 41 | 7 |
|  | Tree Yellow | 0 | 1 | 0 | 4 | 0 | 0 | 0 | 0 | 0 | 0 | 0 | 0 |
|  | Tufted Ace | 0 | 0 | 0 | 1 | 0 | 0 | 0 | 0 | 0 | 0 | 0 | 0 |
|  | Vagrant | 0 | 0 | 0 | 1 | 0 | 0 | 0 | 0 | 0 | 0 | 0 | 0 |
|  | Water Snow Flat | 0 | 1 | 1 | 1 | 0 | 0 | 4 | 0 | 0 | 0 | 2 | 1 |
|  | Yamfly | 2 | 5 | 0 | 5 | 0 | 0 | 0 | 0 | 0 | 0 | 0 | 2 |
|  | Yellow Coster | 2 | 12 | 0 | 1 | 0 | 0 | 41 | 0 | 0 | 0 | 0 | 0 |
|  | Yellow Helen | 2 | 1 | 1 | 2 | 0 | 3 | 0 | 0 | 0 | 0 | 0 | 0 |
|  | Yellow Orange Tip | 0 | 1 | 0 | 0 | 0 | 0 | 6 | 0 | 0 | 0 | 0 | 0 |
|  | Yellow Pansy | 9 | 7 | 0 | 0 | 0 | 0 | 0 | 0 | 0 | 0 | 0 | 0 |
|  | Zebra Blue | 0 | 8 | 3 | 0 | 0 | 5 | 0 | 5 | 0 | 24 | 5 | 0 |
|  | Zema Banded Ace | 0 | 1 | 0 | 0 | 0 | 0 | 0 | 0 | 0 | 0 | 0 | 0 |
