# Supplementary material for: Impact of urbanisation on the diversity and abundance of butterflies along an urban gradient in Guwahati, Assam, India
Source: Research Square preprint supplement (doi:10.21203/rs.3.rs-8777530/v1), 2026-02-19
Supplement: Supplementary file 2 [file ecb35fd7db23e28519b1d1a7.docx]

**Urban Ecosystems**

**Impact of urbanisation on the diversity and abundance of butterflies along an urban gradient in Guwahati, Assam, India**

Nayanjyoti Moran1, Renu Gogoi2, Narayan Sharma1

**1**Department of Environmental Biology and Wildlife Sciences, Cotton University, Panbazar, Guwahati 781001, Assam, India

2Department of Zoology, Cotton University, Panbazar, Guwahati 781001, Assam, India

Email: [narayan.sharma@cottonuniversity.ac.in](mailto:narayan.sharma@cottonuniversity.ac.in) (*corresponding author)


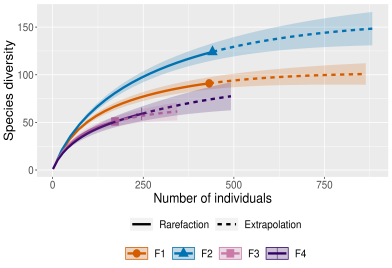

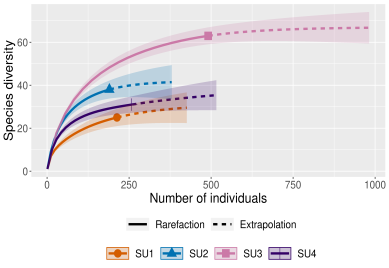

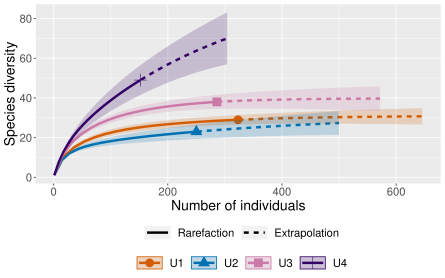


Forest Semi-urban Urban

**Fig. S1** Species accumulation curves for butterfly communities across three habitat types


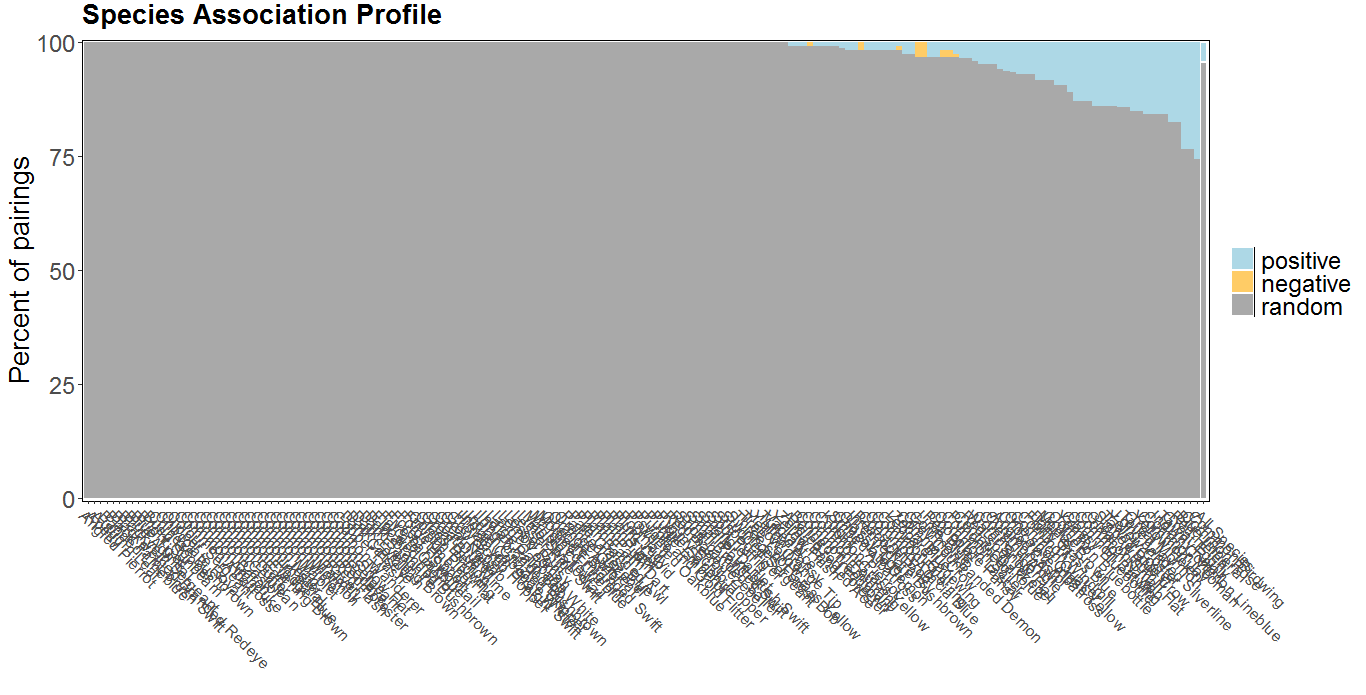


**Fig. S2** Plot showing the percent of total pairings for each species that are positive, negative, or random


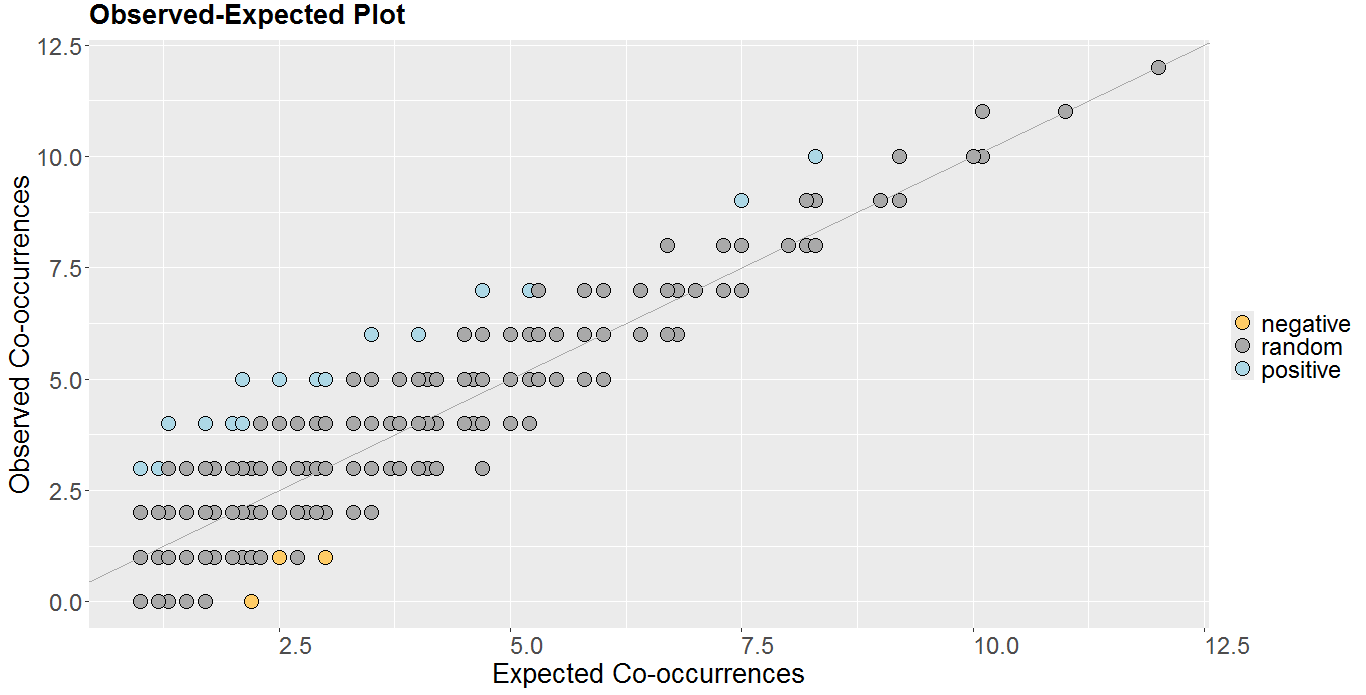


**Fig. S3** Observed versus expected co-occurence scatter plot
